# Supplementary material for: SAMD9L autoinflammatory or ataxia pancytopenia disease mutations activate cell-autonomous translational repression
Source: PubMed Central journal article supplement — Proc Natl Acad Sci U S A. 2021 Aug 20;118(34):e2110190118. doi: 10.1073/pnas.2110190118 (PMC8403910; doi:10.1073/pnas.2110190118), 2021-08-20
Supplement: pnas.2110190118.sapp.pdf [file pnas.2110190118.sapp.pdf]

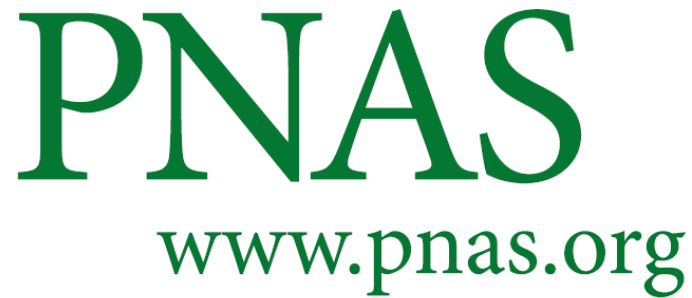

## **Supplementary Information for**

### **SAMD9L AUTOINFLAMMATORY OR ATAXIA PANCYTOPENIA DISEASE MUTATIONS ACTIVATE CELL-AUTONOMOUS TRANSLATIONAL REPRESSION**

Amanda J. Russell<sup>1</sup>, Paul E. Gray<sup>3,4</sup>, John B Ziegler<sup>3,4</sup>, Yae Jean Kim<sup>5</sup>, Sandy Smith<sup>6</sup>, William A. Sewell<sup>1,2</sup> and Christopher C. Goodnow<sup>1,2\*</sup>

<sup>1</sup>Garvan Institute of Medical Research, Darlinghurst, NSW, 2010 Australia

<sup>2</sup>Faculty of Medicine, University of New South Wales Sydney, Australia

<sup>3</sup>Sydney Children's Hospital, Randwick NSW 2031, Australia

<sup>4</sup>School of Women's and Children's Health, University of New South Wales, Sydney, NSW 2010, Australia

<sup>5</sup>Department of Pediatrics, Samsung Medical Center, Sungkyunkwan University School of Medicine, Seoul 06351 Korea

<sup>6</sup>SydPath, St Vincent's Hospital, Darlinghurst NSW 2010.

\* corresponding author

**Email:** [c.goodnow@garvan.org.au](mailto:c.goodnow@garvan.org.au)

**This PDF file includes:**

Figures S1 and S2

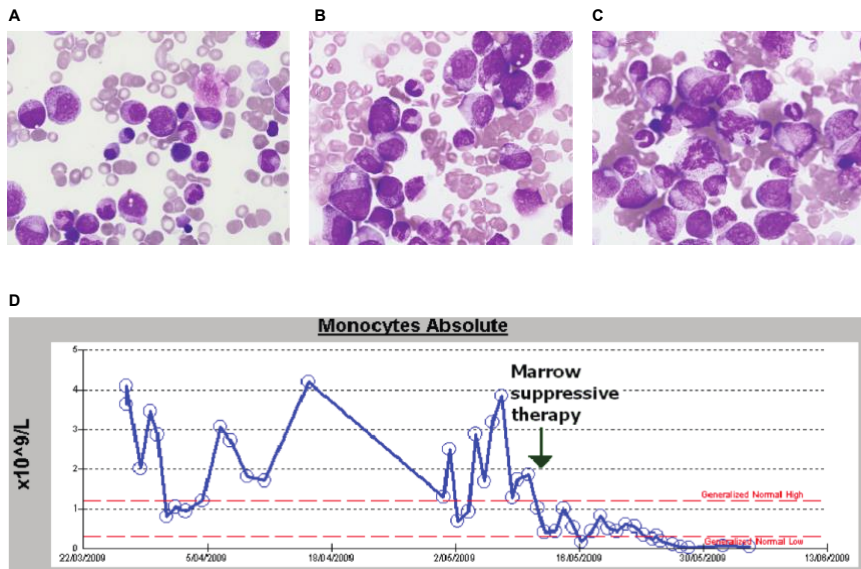

**Fig. S1. Hematological and clinical details for Patient 1.**

P1 is the first child of non-consanguineous Chinese-Australian parents, and presented shortly after birth with a complex multi-system disease including fever and raised inflammatory markers (CRP =179, ESR = 90), hepatosplenomegaly, and the involvement of multiple organs, most notably skin, bone marrow and immune system. He developed erythematous plaques over the head, limbs and thorax which developed into deep ulcerative, scarring lesions. Skin biopsy showed extensive neutrophilic leukocytoclasia with panniculitis, consistent with Sweet's syndrome. He went on to have involvement of other organs, including non-infective epiglottitis and perforated bowel associated with neutrophilic infiltrates. He has calcification of the basal ganglia and learning delay.

Investigations revealed thrombocytopenia ( $41 \times 10^9$ ) and anaemia requiring regular blood transfusions, but with neutrophilia ( $11 \times 10^9$ ). Bone marrow aspirate showed tri-lineage dysplasia with (A) dysplastic erythroid lineage cells, (B, C) dysplastic myeloid cells with excess of mitoses, and dysplastic megakaryocytes. There was a persistent peripheral blood monocytosis (D) until the child was treated with marrow suppressive therapy. No clonal cytogenetic abnormality (e.g. monosomy 7) or Juvenile Myelomonocytic Leukaemia (JMML) specific somatic mutation was identified. The most likely explanation was felt to be myelodysplastic syndrome with refractory anaemia.

Over the 1st year of life P1 presented a B-cell immunodeficiency with low IgG and absent IgA and IgM.

Unexpectedly, after the first year of life he began to produce platelets and red cells and no longer needs transfusions. Peripheral blood testing at aged 4 years demonstrated substantial recovery of mature B cells with a normal phenotype (CD45<sup>bright</sup>, CD10<sup>-</sup>, CD19<sup>+</sup>, CD20<sup>+</sup>, polyclonal light chain<sup>+</sup>) including 3.9% CD27<sup>+</sup> memory and 1.7% class-switched (IgM<sup>-</sup> IgD<sup>-</sup>), although the absolute B-cell count was low ( $0.19 \times 10^9/L$  (NR 0.7-13)) (Fig 7.8). At this time IgG = 5.75g/L (4.3-11.1) and IgA 0.32g/L (0.15-1.42) had normalized, with low IgM = 0.25g/L (0.42-1.61).

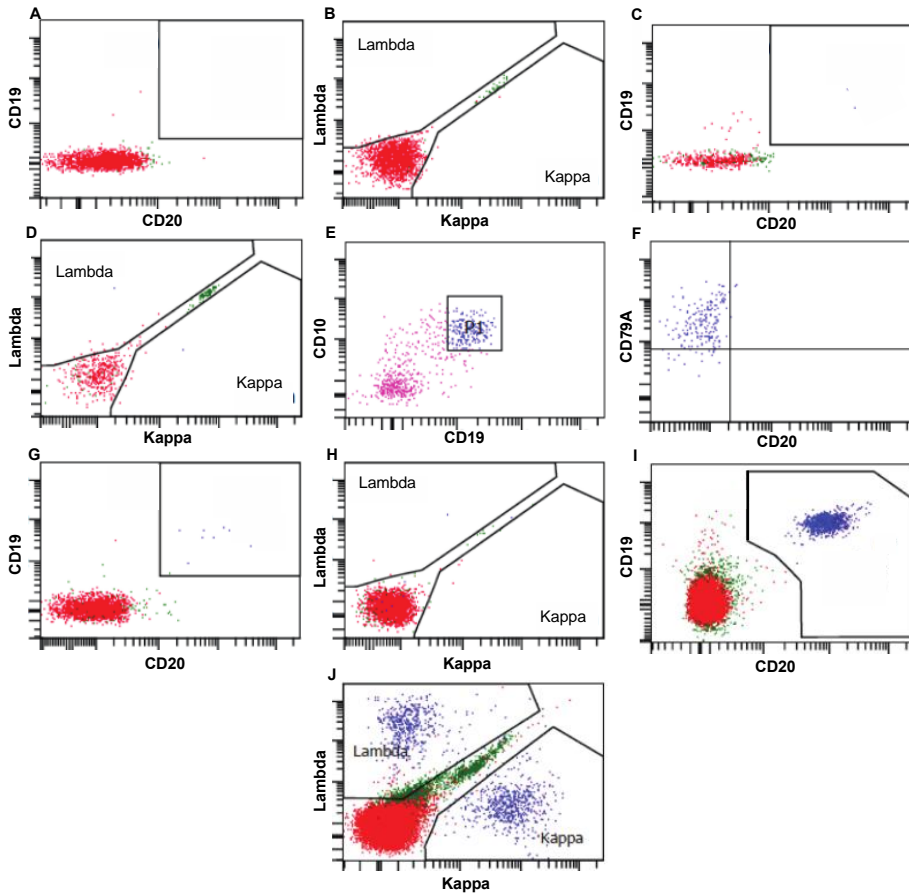

**Fig. S2. Flow cytometric analysis of bone marrow and blood for Patient 1.**

(A-D) Absence of B-cells in blood (A, B) or bone marrow (C, D) at 1 month old. (E-G) Bone marrow at 4 mths old, showing a few B-lineage cells (0.2% of leukocytes), most of which were immature (CD45 dim+ CD10+ CD19+ CD20- CD79a+) and lacked surface light chain staining. A tiny group of more mature CD45bright, CD10+ CD19+ CD20+ cells (G), but these were also antigen receptor negative based on absence of light chain staining (H). (I, J) Peripheral blood at aged 4 years, demonstrating recovery of mature B cells with a normal phenotype of CD45bright, CD10-, CD19+, CD20+, polyclonal light chain+, including 3.9% CD27+ memory and 1.7% class-switched (IgM- IgD) memory B cells, although the absolute B-cell count was low ( $0.19 \times 10^9/L$  (normal range 0.7-13).
